# Supplementary figures and images for: Uniform distribution of copper and cobalt during the synthesis of SiMFI-5 from kanemite through solid-state transformationElectronic supplementary information (ESI) available: XRD patterns for CoSiMFI and CuSiMFI samples synthesised by SST at various stages in the process and containing different metal loadings. See http://www.rsc.org/suppdata/jm/b2/b207539n/
Source: Royal Society of Chemistry journal article supplement (doi:10.1039/b207539n), 2003-01-27

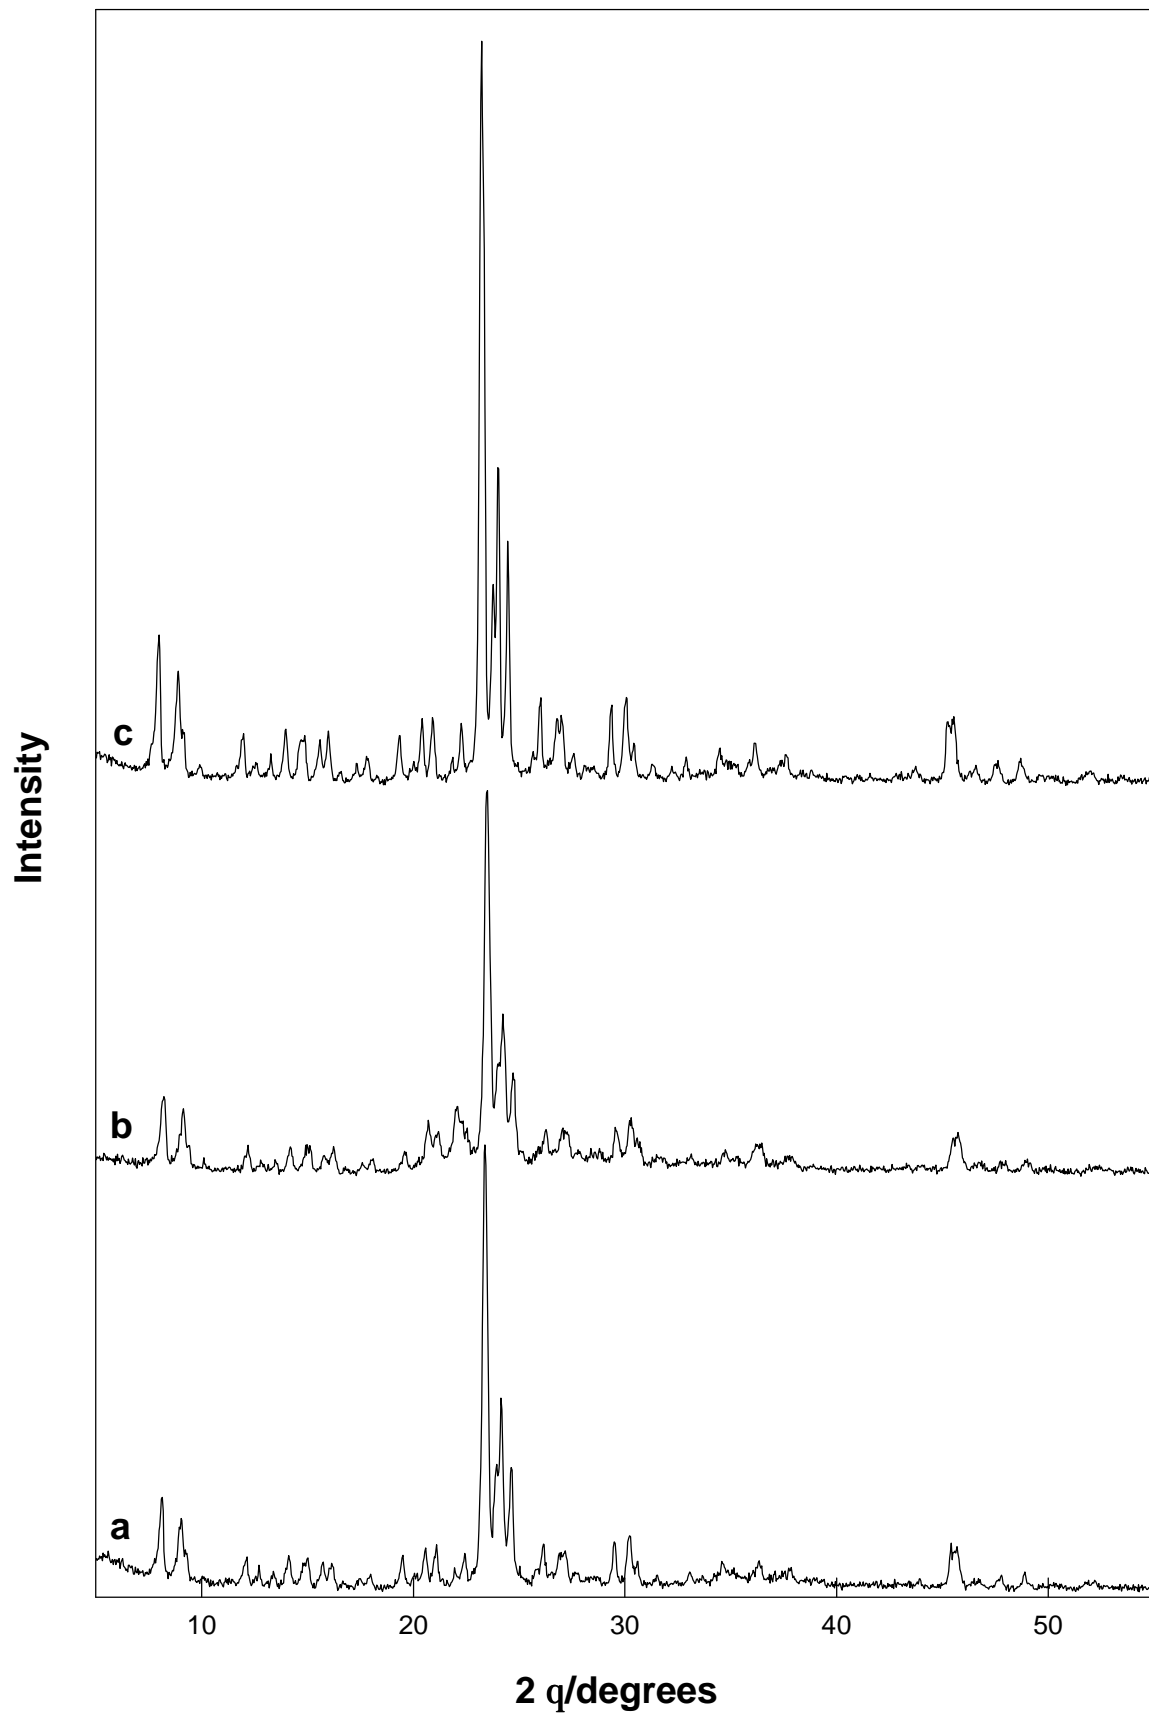

**Fig. 1**

Supplement: b207539n-figs1.pdf [file b207539n-figs1.pdf]

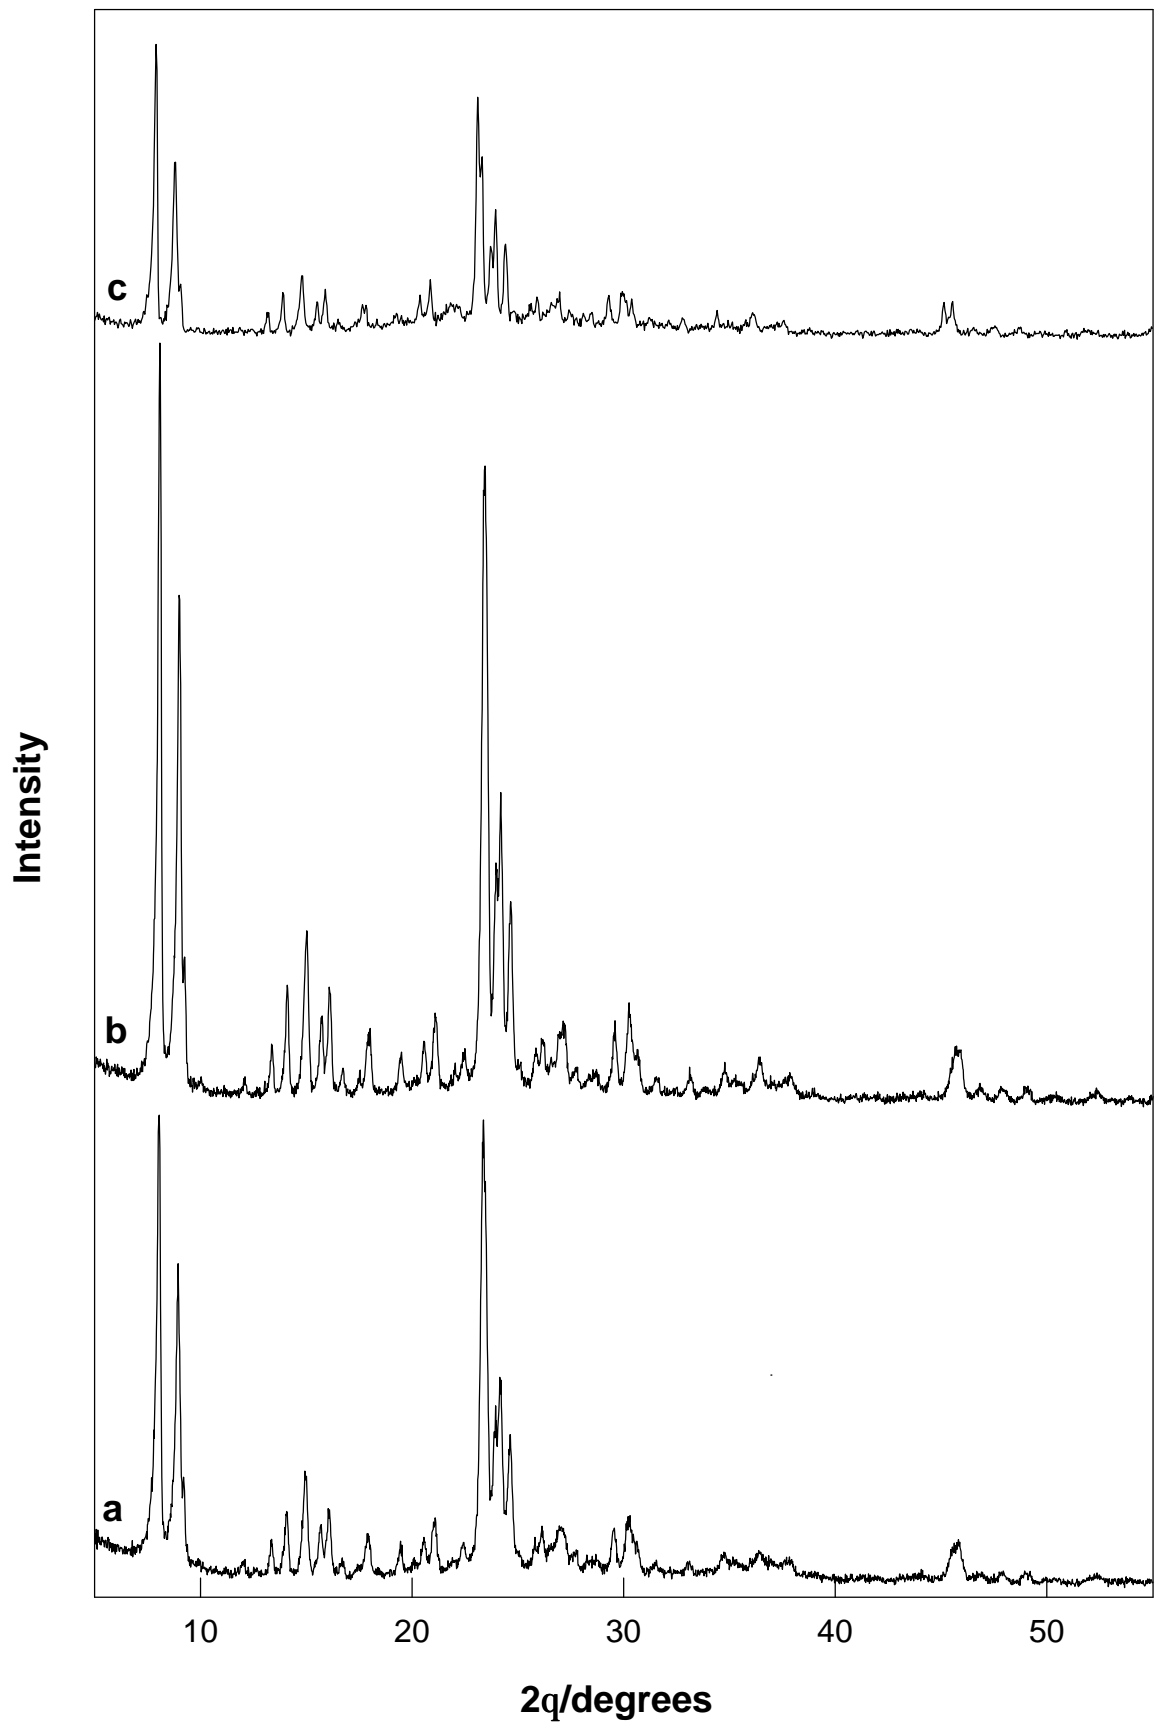

Fig. 2

Supplement: b207539n-figs2.pdf [file b207539n-figs2.pdf]

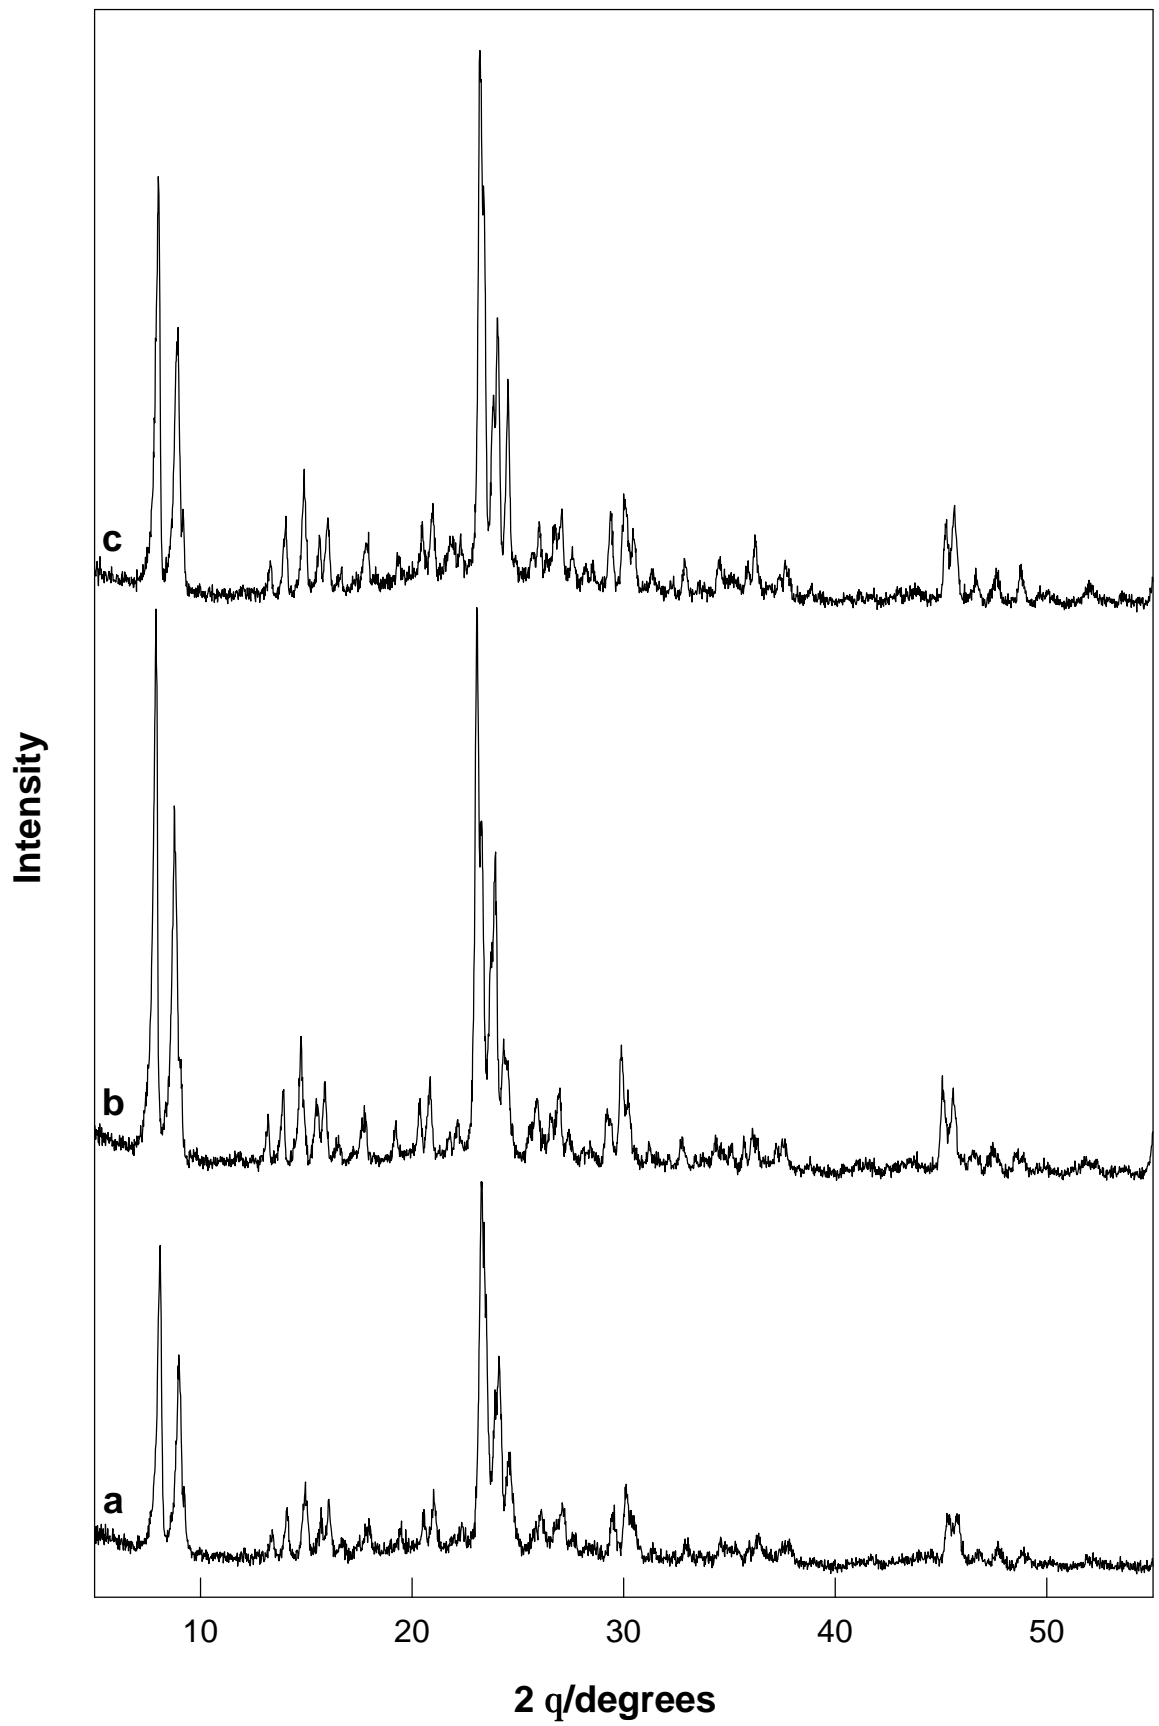

Fig. 3

Supplement: b207539n-figs3.pdf [file b207539n-figs3.pdf]

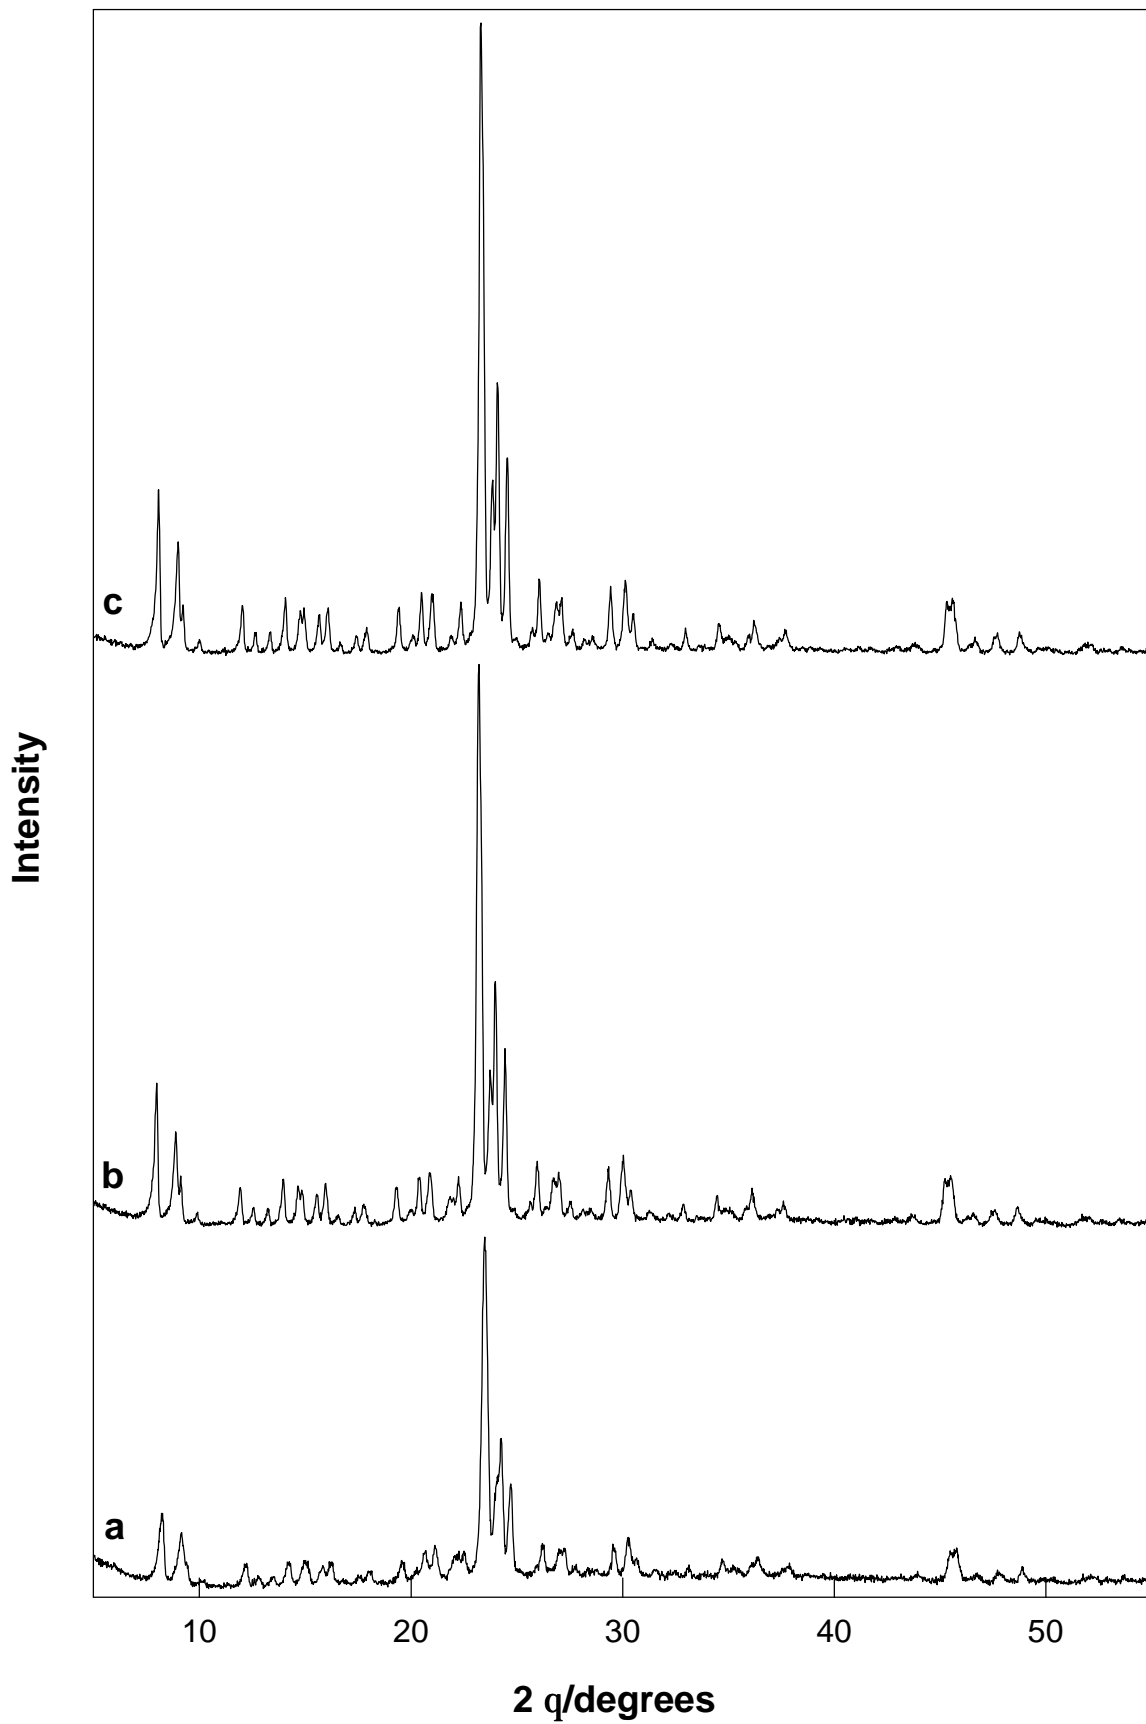

Fig. 4

Supplement: b207539n-figs4.pdf [file b207539n-figs4.pdf]

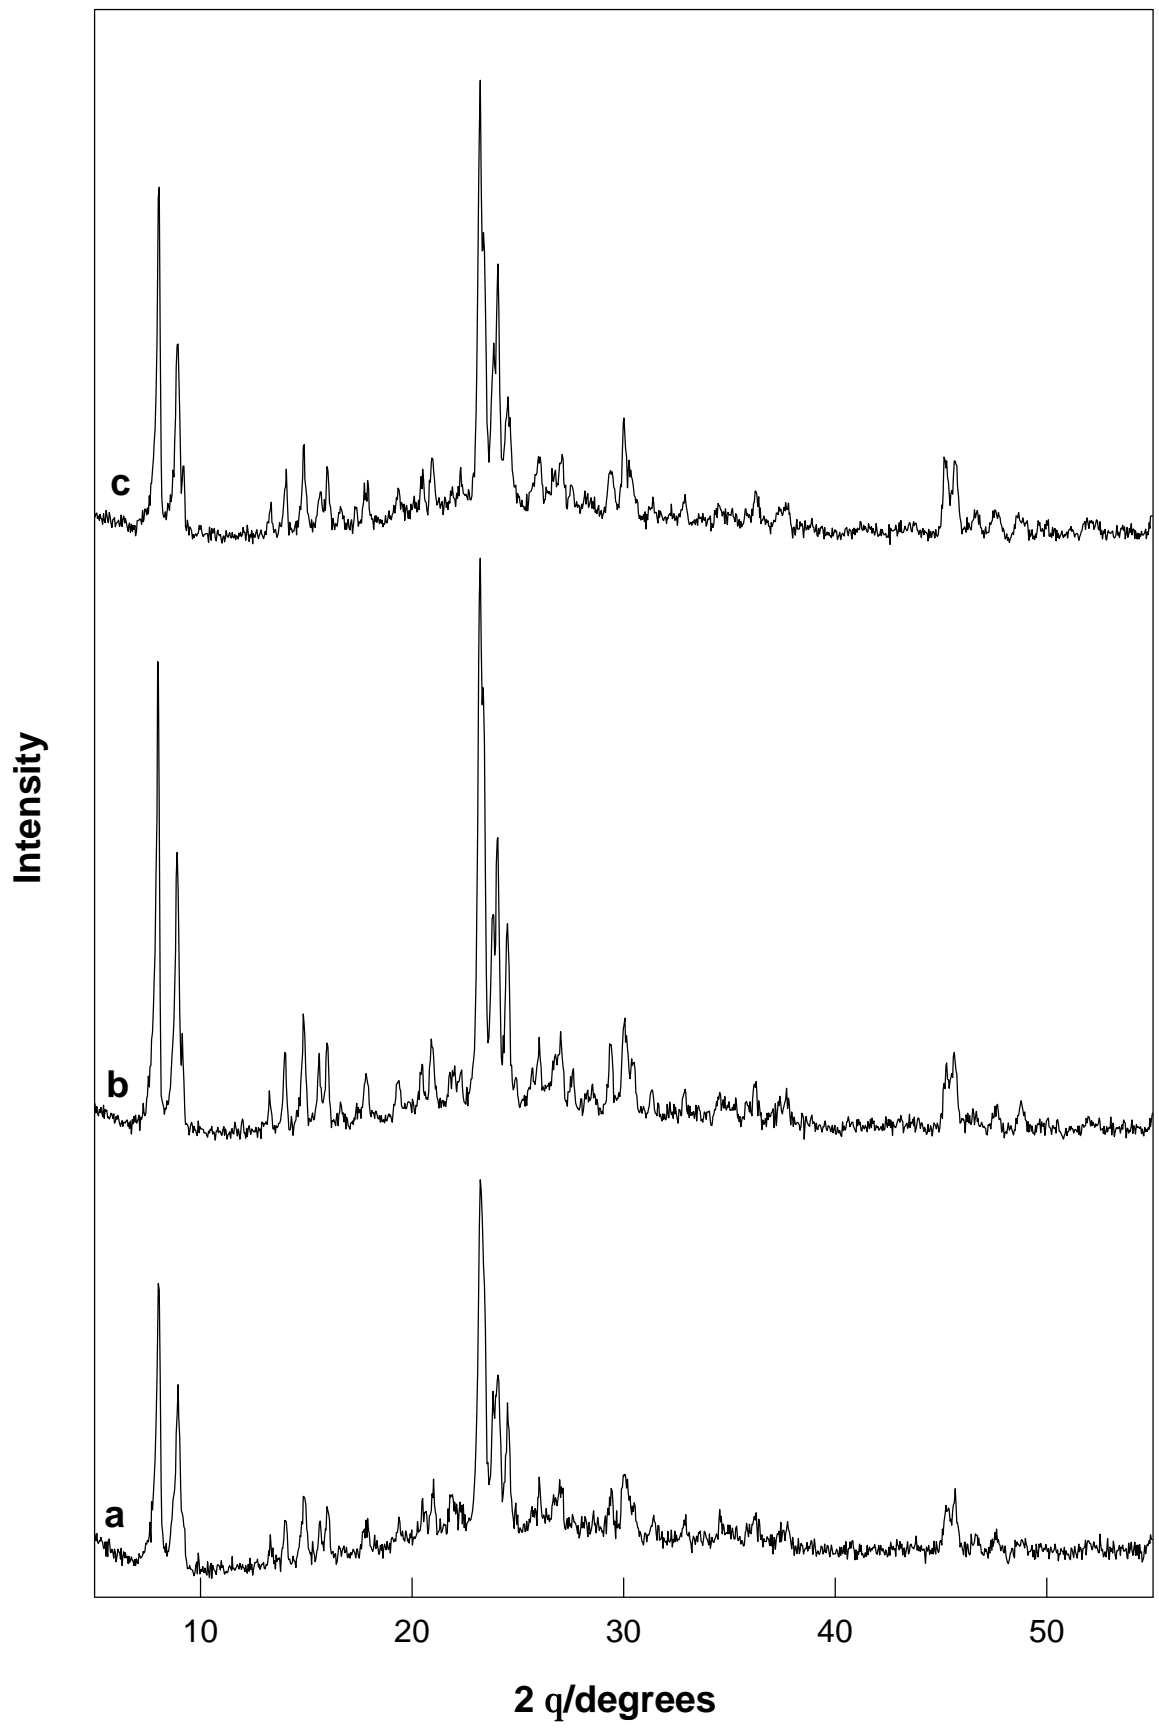

Fig. 5

Supplement: b207539n-figs5.pdf [file b207539n-figs5.pdf]

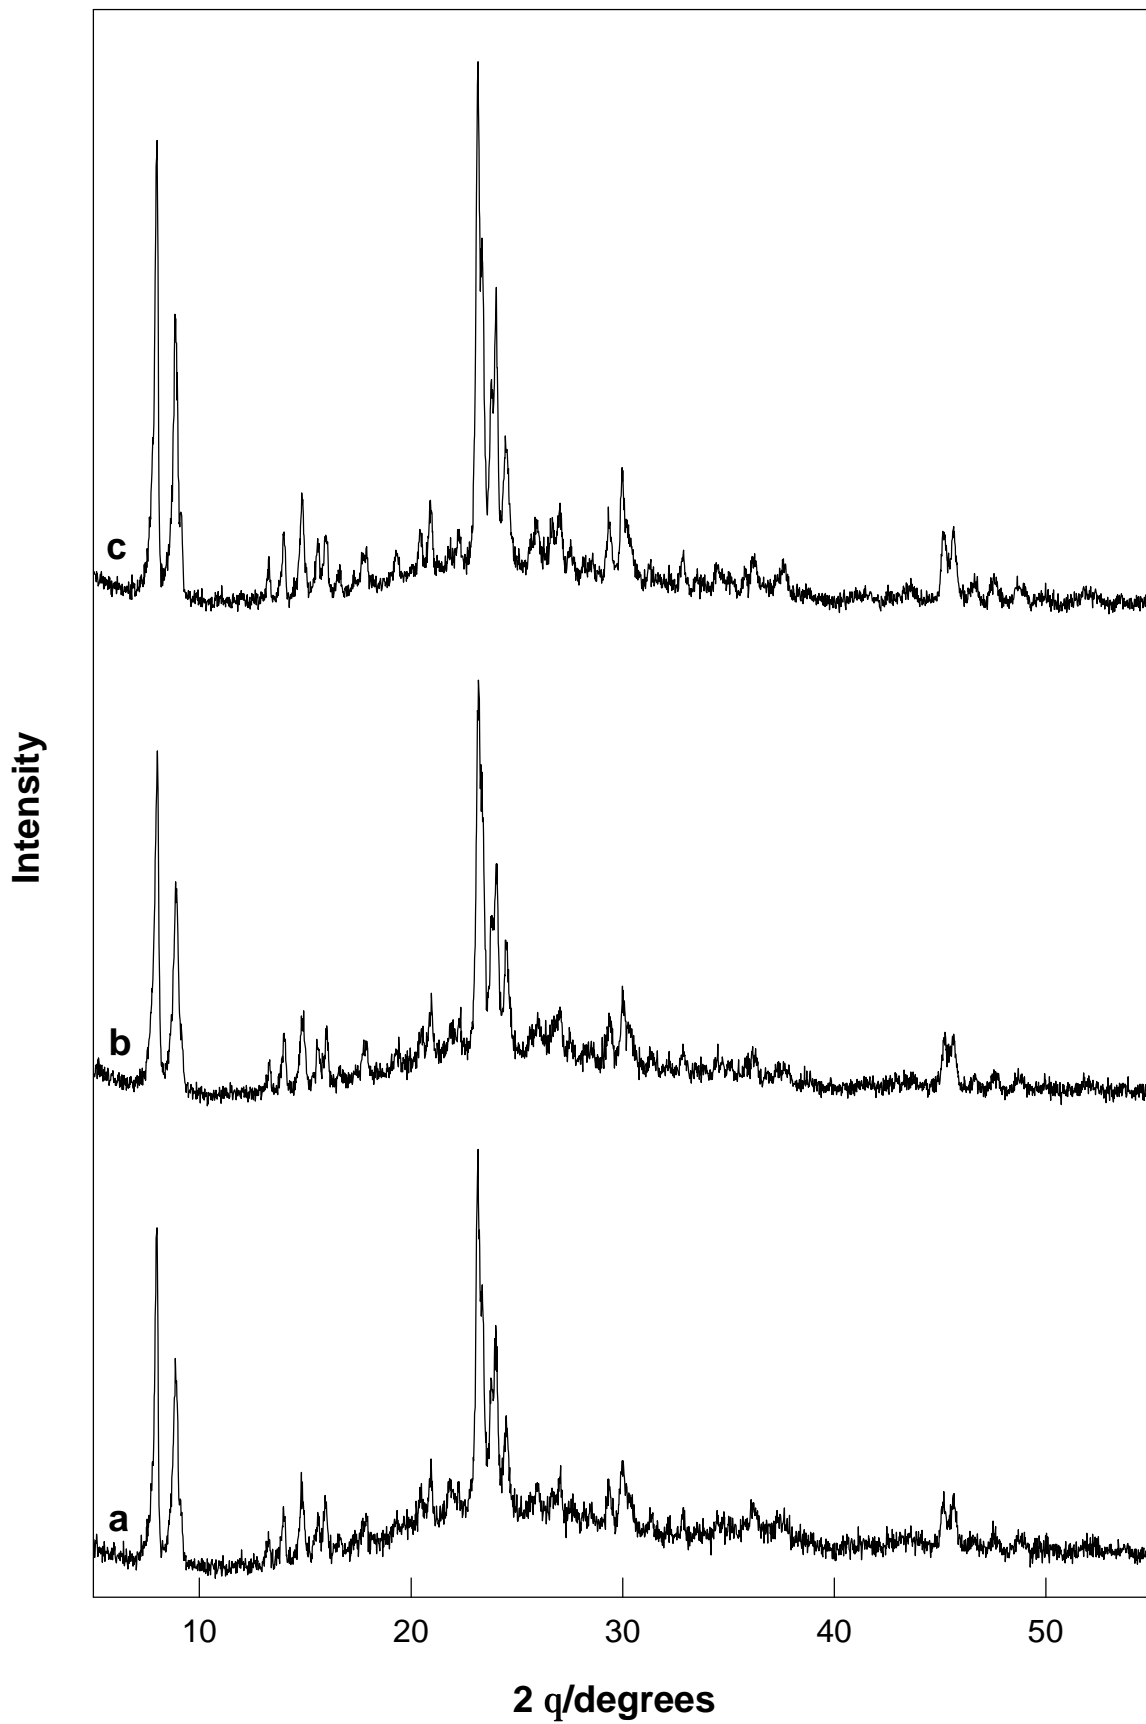

Fig.6

Supplement: b207539n-figs6.pdf [file b207539n-figs6.pdf]
